# Supplementary material for: Bilosomes and Biloparticles for the Delivery of Lipophilic Drugs: A Preliminary Study
Source: Antioxidants (Basel). 2023 Nov 21;12(12):2025. doi: 10.3390/antiox12122025 (PMC10741235; doi:10.3390/antiox12122025)
Supplement: Supplementary file 1 [file antioxidants-12-02025-s001.zip › antioxidants-2701543-supplementary.pdf]

Article

# Bilosomes and Biloparticles for the Delivery of Lipophilic Drugs: A Preliminary Study

Maddalena Sguizzato <sup>1,†</sup>, Francesca Ferrara <sup>1,†</sup>, Nada Baraldo <sup>1</sup>, Agnese Bondi <sup>1</sup>, Annunziata Guarino <sup>2</sup>, Markus Drechsler <sup>3</sup>, Giuseppe Valacchi <sup>4,5,6</sup> and Rita Cortesi <sup>1,7,\*</sup>

**Table S1.** Composition of the produced biloparticles expressed as percentage by weight.

| Acronym | Tristearin | Miglyol 812 | Bile acid | Budesonide | Poloxamer 188<br>2,5%w/w water<br>solution |
|---------|------------|-------------|-----------|------------|--------------------------------------------|
| BilopS  | 4.2        | -           | 0.8       | -          | 95                                         |
| BilopSB | 4.1        | -           | 0.8       | 0.1        | 95                                         |
| BilopN  | 2.55       | 1.65        | 0.8       | -          | 95                                         |
| BilopNB | 2.45       | 1.65        | 0.8       | 0.1        | 95                                         |

**Table S2.** Composition of ursodeoxycholic bilosomes used for the preformulatory study

| Component | Concentration mg/ml |         |
|-----------|---------------------|---------|
|           | BiloPU              | BiloPCU |
| PC        | 20                  | 20      |
| CH        | -                   | 2.5     |
| UDCA      | 5                   | 2.5     |

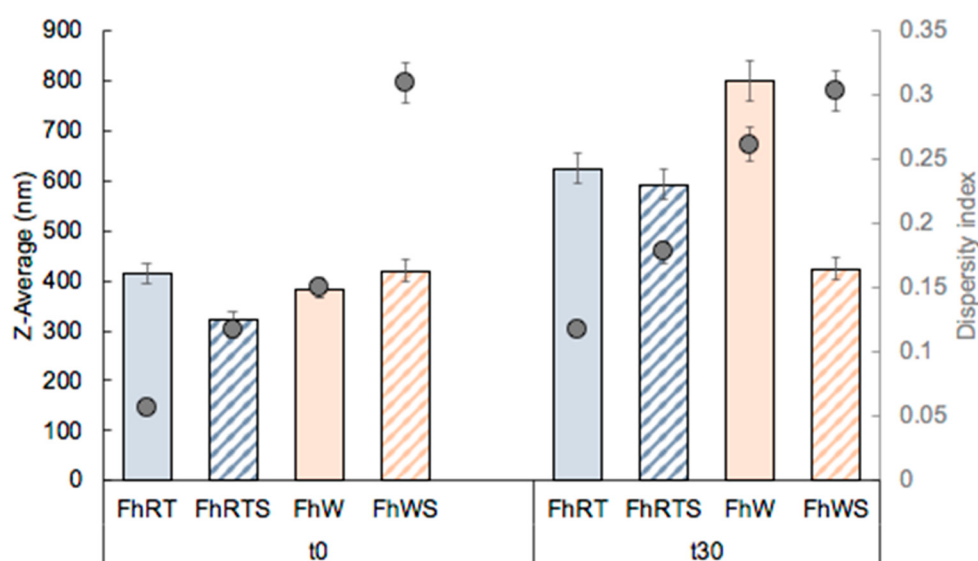

**Figure S1.** Size after production and after 30 days of storage of Bilos\_PCU obtained following different protocols (FhRT, FhRTS, FhW, FhWS). The size is expressed as average diameter (Z-Average) and dispersity index (PdI). The values are the mean of 3 batches  $\pm$  s.d.

**Table S3.** Composition in percentage by weight, of biloparticles used in the preformulation study.

| Biloparticle system | Tristearin<br>n | Bile acid | Miglyol 812 | Poloxamer 188<br>(solution 2.5%w/w) |
|---------------------|-----------------|-----------|-------------|-------------------------------------|
| BilopS1             | 4.8             | 0.2       | 0           | 95                                  |
| BilopS2             | 4.6             | 0.4       | 0           | 95                                  |
| BilopS4             | 4.2             | 0.8       | 0           | 95                                  |
| BilopS6             | 3.8             | 1.2       | 0           | 95                                  |

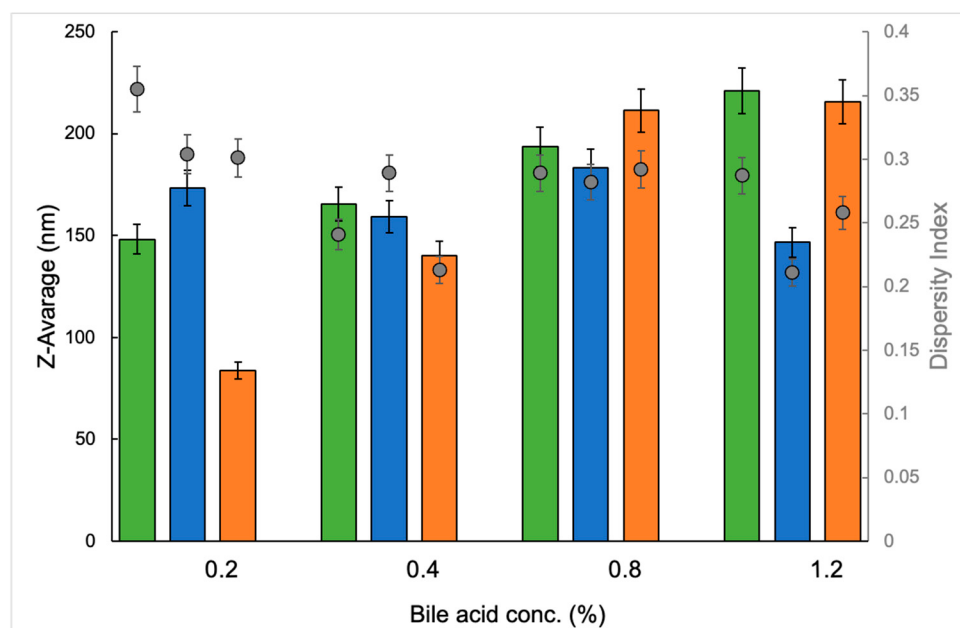**Figure S2.** Mean diameter (Z-Average) (a) and Polydispersity (PdI) (b) after production of BilopS\_C (green), BilopS\_U (blue), BilopS\_T (orange) with increasing concentration of bile acids as determined PCS. Each value is the average of 2 batches  $\pm$  s.d.

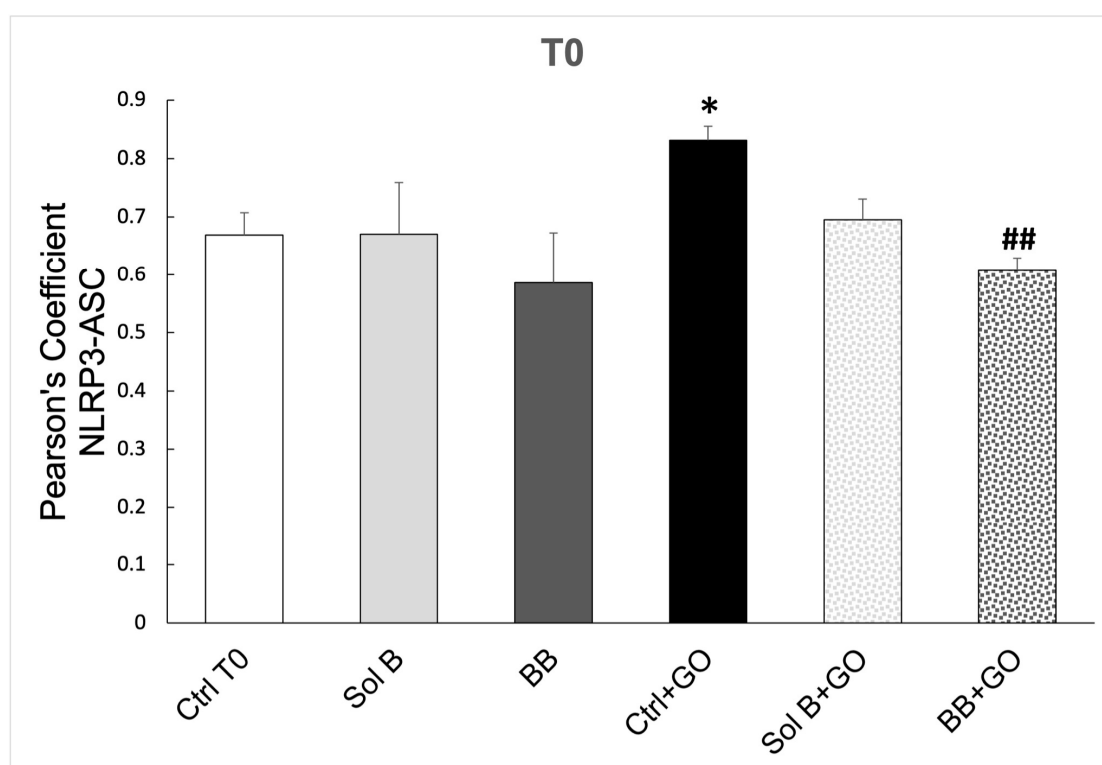

**Figure S3.** Colocalization expression levels of NLRP3 and ASC (Pearson's correlation coefficient) in CaCo2 cells treated with formulations containing budesonide and exposed to 0.5 U/ml of GO for 1 hour. The colocalization expression levels was quantified by using ImageJ software. Data are the results of the averages of at least three different experiments by 2-way ANOVA followed by Tukey's post-hoc comparison test. \* $p < 0.05$  ; ##  $p < 0.01$ ; (\* respect Ctrl and # respect Ctrl+GO).
